# Supplementary material
Source: MDPI journal article supplement (https://www.mdpi.com/1999-4907/15/5/735)
Supplement: s1 [file s1]

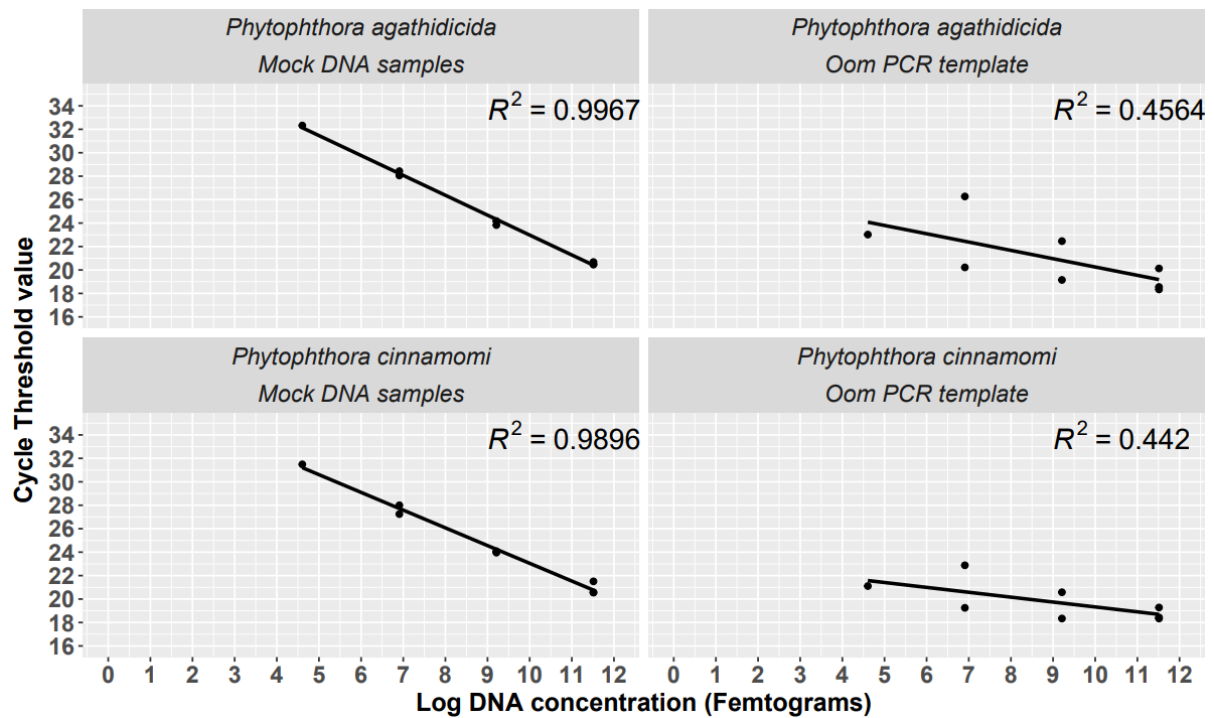

**Supplementary Materials Figure S1** Relationship between the DNA concentration (log femtograms) of the spiked mock community samples (for the ITS metabarcoding) and the cycle threshold (Cq) values in the multiplexed qPCR validation for *Phytophthora agathidicida* and *P. cinnamomi*. 'Mock DNA samples' shows the Cq values of the neat spiked eDNA samples as template and 'Oom PCR template' shows the Cq values when 1:100,000 dilutions of the oomycete specific PCR product (amplified with ITS primers oom18s/ITS7 for the primary metabarcoding PCR) was used as template in a qPCR.
