# Supplementary material
Source: MDPI journal article supplement (https://www.mdpi.com/1999-4907/15/5/735)
Supplement: s1 [file s1]

**Supplementary Materials Table S2:** Sequence read counts from the RPS10 metabarcoding for the 30 soil samples which were selected for amplification with the nested RPS10 metabarcoding approach.

| Sample ID | RPS10 sequence reads                                |                                                     |                                  |                               |                                     |
|-----------|-----------------------------------------------------|-----------------------------------------------------|----------------------------------|-------------------------------|-------------------------------------|
|           | <i>Phytophthora</i> sp. ( <i>P. europaea</i> -like) | <i>Phytophthora</i> sp. ( <i>P. europaea</i> -like) | <i>Phytophthora agathidicida</i> | <i>Phytophthora cinnamomi</i> | <i>Phytophthora pseudocryptogea</i> |
|           | ASV_4                                               | ASV_10                                              | ASV_33                           | ASV_42                        | ASV_80                              |
| 5016      | 0                                                   | 0                                                   | 87                               | 479                           | 0                                   |
| 5017      | 0                                                   | 6318                                                | 0                                | 0                             | 0                                   |
| 5021      | 99                                                  | 0                                                   | 0                                | 0                             | 0                                   |
| 5059      | 0                                                   | 0                                                   | 0                                | 0                             | 0                                   |
| 5068      | 0                                                   | 0                                                   | 0                                | 0                             | 0                                   |
| 5080      | 0                                                   | 0                                                   | 0                                | 0                             | 0                                   |
| 5147      | 0                                                   | 182                                                 | 0                                | 0                             | 0                                   |
| 5159      | 0                                                   | 0                                                   | 0                                | 0                             | 0                                   |
| 5174      | 0                                                   | 0                                                   | 0                                | 0                             | 72                                  |
| 5186      | 0                                                   | 0                                                   | 0                                | 0                             | 0                                   |
| 5232      | 0                                                   | 0                                                   | 0                                | 0                             | 0                                   |
| 5273      | 590                                                 | 0                                                   | 0                                | 0                             | 0                                   |
| 5276      | 889                                                 | 0                                                   | 0                                | 0                             | 0                                   |
| 5305      | 0                                                   | 0                                                   | 0                                | 0                             | 0                                   |
| 5330      | 0                                                   | 0                                                   | 0                                | 0                             | 0                                   |
| 5362      | 0                                                   | 0                                                   | 0                                | 0                             | 0                                   |
| 5382      | 0                                                   | 0                                                   | 0                                | 0                             | 0                                   |
| 5385      | 0                                                   | 0                                                   | 0                                | 4                             | 0                                   |
| 5405      | 127                                                 | 0                                                   | 0                                | 0                             | 0                                   |
| 5414      | 3922                                                | 0                                                   | 0                                | 0                             | 0                                   |
| 5441      | 199                                                 | 0                                                   | 0                                | 0                             | 0                                   |
| 5448      | 0                                                   | 0                                                   | 0                                | 0                             | 0                                   |
| 5462      | 3378                                                | 0                                                   | 0                                | 0                             | 0                                   |
| 5499      | 0                                                   | 0                                                   | 0                                | 0                             | 0                                   |
| 5556      | 0                                                   | 0                                                   | 0                                | 0                             | 0                                   |
| 5560      | 147                                                 | 0                                                   | 0                                | 0                             | 0                                   |
| 5577      | 11                                                  | 0                                                   | 0                                | 0                             | 0                                   |
| 5611      | 1783                                                | 0                                                   | 0                                | 0                             | 0                                   |
| 5678      | 0                                                   | 0                                                   | 1091                             | 0                             | 0                                   |
| 5725      | 0                                                   | 0                                                   | 0                                | 0                             | 0                                   |

NB. ASV4 and ASV10 differ by 1 bp
