# Supplementary material
Source: MDPI journal article supplement (https://www.mdpi.com/1999-4907/15/5/735)
Supplement: s1 [file s1]

## Species Co-occurrence Matrix

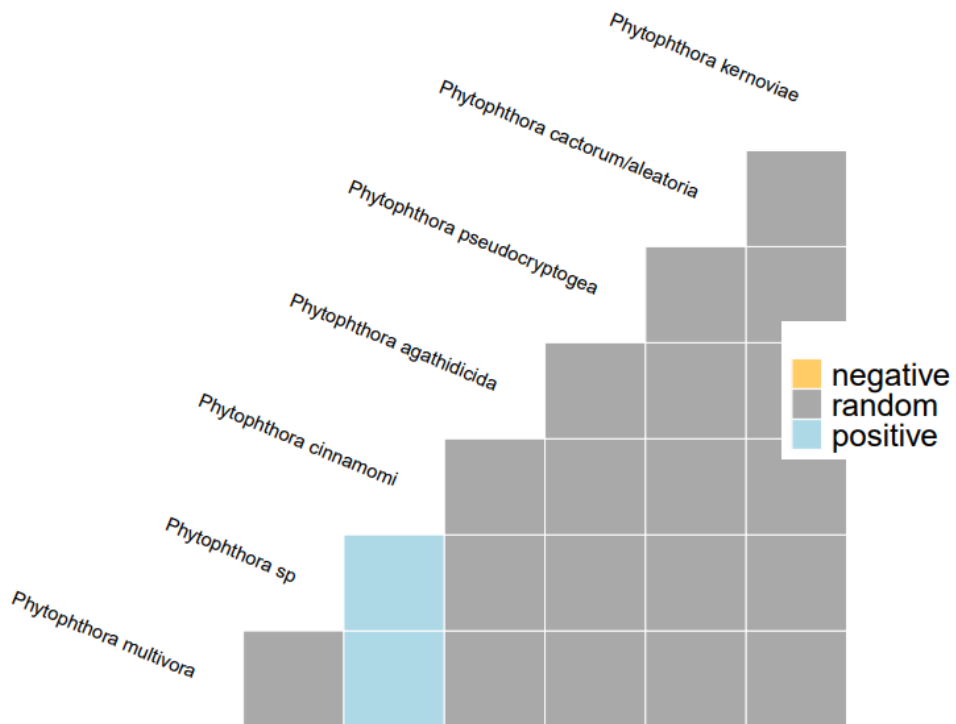

**Supplementary Materials Figure S2.** Pairwise co-occurrence matrix for the *Phytophthora* species detected in the current study. Orange and blue tiles correspond to species pairs that were less or more likely to co-occur than predicted by a null model. Created in R with the package cooccur version 1.3.
