# Supplementary material
Source: MDPI journal article supplement (https://www.mdpi.com/1999-4907/15/5/735)
Supplement: s1 [file s1]

**Supplementary Materials Table S1:** Sequence read counts from the ITS metabarcoding for the 30 soil samples which were selected for amplification with the nested RPS10 metabarcoding approach.

| Sample ID | ITS sequence reads            |                                  |                               |                                                    |                                            |                                     |                               |
|-----------|-------------------------------|----------------------------------|-------------------------------|----------------------------------------------------|--------------------------------------------|-------------------------------------|-------------------------------|
|           | <i>Phytophthora cinnamomi</i> | <i>Phytophthora agathidicida</i> | <i>Phytophthora multivora</i> | <i>Phytophthora</i> sp ( <i>P. europaea</i> -like) | <i>Phytophthora cactorum/ P. aleatoria</i> | <i>Phytophthora pseudocryptogea</i> | <i>Phytophthora kernoviae</i> |
|           | ASV_1                         | ASV_2                            | ASV_7                         | ASV_10                                             | ASV_11                                     | ASV_30                              | ASV_32                        |
| 5016      | 37222                         | 6229                             | 0                             | 0                                                  | 0                                          | 0                                   | 0                             |
| 5017      | 12732                         | 0                                | 0                             | 502                                                | 0                                          | 0                                   | 0                             |
| 5021      | 0                             | 0                                | 0                             | 22062                                              | 0                                          | 0                                   | 0                             |
| 5059      | 0                             | 0                                | 0                             | 850                                                | 0                                          | 0                                   | 0                             |
| 5068      | 0                             | 0                                | 0                             | 760                                                | 0                                          | 0                                   | 0                             |
| 5080      | 0                             | 0                                | 6878                          | 12285                                              | 0                                          | 0                                   | 0                             |
| 5147      | 0                             | 0                                | 0                             | 8797                                               | 0                                          | 0                                   | 0                             |
| 5159      | 4397                          | 0                                | 0                             | 11057                                              | 0                                          | 0                                   | 0                             |
| 5174      | 0                             | 0                                | 0                             | 4037                                               | 0                                          | 6659                                | 0                             |
| 5186      | 0                             | 0                                | 0                             | 0                                                  | 36025                                      | 0                                   | 0                             |
| 5232      | 0                             | 0                                | 0                             | 205                                                | 0                                          | 0                                   | 0                             |
| 5273      | 0                             | 0                                | 0                             | 433                                                | 0                                          | 0                                   | 0                             |
| 5276      | 0                             | 0                                | 0                             | 472                                                | 0                                          | 0                                   | 0                             |
| 5305      | 7969                          | 1360                             | 0                             | 0                                                  | 0                                          | 2754                                | 0                             |
| 5330      | 0                             | 0                                | 0                             | 0                                                  | 10358                                      | 0                                   | 0                             |
| 5362      | 0                             | 0                                | 0                             | 0                                                  | 0                                          | 0                                   | 5381                          |
| 5382      | 0                             | 0                                | 268                           | 0                                                  | 0                                          | 0                                   | 0                             |
| 5385      | 5002                          | 0                                | 0                             | 0                                                  | 10692                                      | 0                                   | 0                             |
| 5405      | 0                             | 0                                | 0                             | 450                                                | 0                                          | 0                                   | 0                             |
| 5414      | 0                             | 0                                | 0                             | 671                                                | 0                                          | 0                                   | 0                             |
| 5441      | 0                             | 0                                | 0                             | 409                                                | 0                                          | 0                                   | 0                             |
| 5448      | 0                             | 0                                | 0                             | 221                                                | 0                                          | 0                                   | 0                             |
| 5462      | 0                             | 0                                | 0                             | 584                                                | 0                                          | 0                                   | 0                             |
| 5499      | 14381                         | 0                                | 0                             | 0                                                  | 1547                                       | 0                                   | 0                             |
| 5556      | 0                             | 0                                | 0                             | 493                                                | 0                                          | 0                                   | 0                             |
| 5560      | 99                            | 1093                             | 0                             | 302                                                | 0                                          | 0                                   | 0                             |
| 5577      | 0                             | 0                                | 0                             | 252                                                | 0                                          | 0                                   | 0                             |
| 5611      | 0                             | 0                                | 0                             | 330                                                | 0                                          | 0                                   | 0                             |
| 5678      | 0                             | 0                                | 0                             | 0                                                  | 0                                          | 0                                   | 0                             |
| 5725      | 0                             | 0                                | 0                             | 0                                                  | 0                                          | 0                                   | 12304                         |
